# Supplementary material for: Construction of Monophosphoryl Lipid A Producing Escherichia coli Mutants and Comparison of Immuno-Stimulatory Activities of Their Lipopolysaccharides
Source: MDPI journal article supplement (doi:10.3390/md11020363), 2013-01-31
Supplement: s3 [file s3]

marinedrugs-11-00363-s002.mol
  corina  05201404073D 1   1.00000     0.00000 
CORINA 3.49 0023  12.04.2013
119120  0  0  0  0  0  0  0  0999 V2000
    0.1166    0.1585    0.4288 C   0  0  0  0  0  0  0  0  0  0  0  0
    1.3760    1.0266    0.3458 C   0  0  0  0  0  0  0  0  0  0  0  0
    2.3545    0.5934    1.4418 C   0  0  0  0  0  0  0  0  0  0  0  0
    2.6643   -0.8970    1.2785 C   0  0  0  0  0  0  0  0  0  0  0  0
    1.4473   -1.6440    1.3346 O   0  0  0  0  0  0  0  0  0  0  0  0
    0.5128   -1.3150    0.3047 C   0  0  0  0  0  0  0  0  0  0  0  0
    3.3004   -1.1162    0.0179 O   0  0  0  0  0  0  0  0  0  0  0  0
    3.7340   -2.4621   -0.1881 C   0  0  0  0  0  0  0  0  0  0  0  0
    4.9706   -3.9888   -1.7331 C   0  0  0  0  0  0  0  0  0  0  0  0
    5.5789   -4.1174   -3.1330 C   0  0  0  0  0  0  0  0  0  0  0  0
    4.5041   -3.7969   -4.1762 C   0  0  0  0  0  0  0  0  0  0  0  0
    3.9483   -2.3953   -3.9108 C   0  0  0  0  0  0  0  0  0  0  0  0
    3.4262   -2.3351   -2.5820 O   0  0  0  0  0  0  0  0  0  0  0  0
    4.3968   -2.5798   -1.5621 C   0  0  0  0  0  0  0  0  0  0  0  0
   -0.7328   -2.1920    0.4468 C   0  0  0  0  0  0  0  0  0  0  0  0
   -0.3823   -3.5581    0.2168 O   0  0  0  0  0  0  0  0  0  0  0  0
    2.9057   -2.1111   -4.8458 O   0  0  0  0  0  0  0  0  0  0  0  0
    3.9267   -4.9519   -1.5757 O   0  0  0  0  0  0  0  0  0  0  0  0
    1.0184    2.4208    0.5372 O   0  0  0  0  0  0  0  0  0  0  0  0
    0.7164    3.1289   -0.5624 C   0  0  0  0  0  0  0  0  0  0  0  0
    0.3358    4.5821   -0.4418 C   0  0  0  0  0  0  0  0  0  0  0  0
    0.0426    5.1495   -1.8321 C   0  0  0  0  0  0  0  0  0  0  0  0
   -0.4635    6.5873   -1.6997 C   0  0  0  0  0  0  0  0  0  0  0  0
   -0.8744    7.1122   -3.0769 C   0  0  0  0  0  0  0  0  0  0  0  0
   -1.3805    8.5500   -2.9446 C   0  0  0  0  0  0  0  0  0  0  0  0
   -1.7914    9.0748   -4.3217 C   0  0  0  0  0  0  0  0  0  0  0  0
   -2.2975   10.5126   -4.1894 C   0  0  0  0  0  0  0  0  0  0  0  0
   -2.7084   11.0374   -5.5666 C   0  0  0  0  0  0  0  0  0  0  0  0
   -3.2145   12.4752   -5.4342 C   0  0  0  0  0  0  0  0  0  0  0  0
   -3.6255   13.0000   -6.8114 C   0  0  0  0  0  0  0  0  0  0  0  0
   -4.1316   14.4378   -6.6790 C   0  0  0  0  0  0  0  0  0  0  0  0
   -4.5425   14.9626   -8.0562 C   0  0  0  0  0  0  0  0  0  0  0  0
   -5.0486   16.4004   -7.9239 C   0  0  0  0  0  0  0  0  0  0  0  0
    0.7497    2.6013   -1.6488 O   0  0  0  0  0  0  0  0  0  0  0  0
    1.2577    5.1354   -2.6268 O   0  0  0  0  0  0  0  0  0  0  0  0
    1.1163    4.9916   -3.9538 C   0  0  0  0  0  0  0  0  0  0  0  0
    2.3328    4.9678   -4.8430 C   0  0  0  0  0  0  0  0  0  0  0  0
    1.8967    4.7945   -6.2993 C   0  0  0  0  0  0  0  0  0  0  0  0
    3.1318    4.7704   -7.2021 C   0  0  0  0  0  0  0  0  0  0  0  0
    2.6957    4.5970   -8.6583 C   0  0  0  0  0  0  0  0  0  0  0  0
    3.9308    4.5729   -9.5611 C   0  0  0  0  0  0  0  0  0  0  0  0
    3.4947    4.3996  -11.0174 C   0  0  0  0  0  0  0  0  0  0  0  0
    4.7297    4.3755  -11.9201 C   0  0  0  0  0  0  0  0  0  0  0  0
    4.2937    4.2021  -13.3764 C   0  0  0  0  0  0  0  0  0  0  0  0
    5.5287    4.1780  -14.2792 C   0  0  0  0  0  0  0  0  0  0  0  0
    5.0927    4.0047  -15.7354 C   0  0  0  0  0  0  0  0  0  0  0  0
    6.3277    3.9806  -16.6382 C   0  0  0  0  0  0  0  0  0  0  0  0
    5.8916    3.8072  -18.0945 C   0  0  0  0  0  0  0  0  0  0  0  0
    7.1267    3.7831  -18.9972 C   0  0  0  0  0  0  0  0  0  0  0  0
    0.0137    4.8812   -4.4354 O   0  0  0  0  0  0  0  0  0  0  0  0
    3.5934    1.3665    1.3255 N   0  0  0  0  0  0  0  0  0  0  0  0
    4.3804    1.5447    2.4050 C   0  0  0  0  0  0  0  0  0  0  0  0
    4.0630    1.0650    3.4727 O   0  0  0  0  0  0  0  0  0  0  0  0
    5.6549    2.3400    2.2854 C   0  0  0  0  0  0  0  0  0  0  0  0
    6.2767    2.5185    3.6718 C   0  0  0  0  0  0  0  0  0  0  0  0
    5.3210    3.3171    4.5605 C   0  0  0  0  0  0  0  0  0  0  0  0
    5.9967    3.6107    5.9014 C   0  0  0  0  0  0  0  0  0  0  0  0
    5.0409    4.4093    6.7901 C   0  0  0  0  0  0  0  0  0  0  0  0
    5.7167    4.7029    8.1310 C   0  0  0  0  0  0  0  0  0  0  0  0
    4.7609    5.5015    9.0197 C   0  0  0  0  0  0  0  0  0  0  0  0
    5.4366    5.7951   10.3606 C   0  0  0  0  0  0  0  0  0  0  0  0
    4.4809    6.5937   11.2493 C   0  0  0  0  0  0  0  0  0  0  0  0
    5.1566    6.8873   12.5902 C   0  0  0  0  0  0  0  0  0  0  0  0
    4.2009    7.6859   13.4789 C   0  0  0  0  0  0  0  0  0  0  0  0
    4.8766    7.9794   14.8198 C   0  0  0  0  0  0  0  0  0  0  0  0
    3.9208    8.7781   15.7085 C   0  0  0  0  0  0  0  0  0  0  0  0
    6.5157    1.2155    4.2665 O   0  0  0  0  0  0  0  0  0  0  0  0
    7.6666    0.6024    3.9484 C   0  0  0  0  0  0  0  0  0  0  0  0
    7.9327   -0.7993    4.4336 C   0  0  0  0  0  0  0  0  0  0  0  0
    9.3039   -1.2599    3.9350 C   0  0  0  0  0  0  0  0  0  0  0  0
    9.5741   -2.6830    4.4276 C   0  0  0  0  0  0  0  0  0  0  0  0
   10.9453   -3.1436    3.9290 C   0  0  0  0  0  0  0  0  0  0  0  0
   11.2154   -4.5667    4.4216 C   0  0  0  0  0  0  0  0  0  0  0  0
   12.5866   -5.0273    3.9230 C   0  0  0  0  0  0  0  0  0  0  0  0
   12.8568   -6.4504    4.4156 C   0  0  0  0  0  0  0  0  0  0  0  0
   14.2279   -6.9110    3.9170 C   0  0  0  0  0  0  0  0  0  0  0  0
   14.4981   -8.3342    4.4096 C   0  0  0  0  0  0  0  0  0  0  0  0
   15.8693   -8.7948    3.9110 C   0  0  0  0  0  0  0  0  0  0  0  0
   16.1395  -10.2179    4.4036 C   0  0  0  0  0  0  0  0  0  0  0  0
    8.4893    1.1743    3.2731 O   0  0  0  0  0  0  0  0  0  0  0  0
   -0.5306    0.3749    1.6844 O   0  0  0  0  0  0  0  0  0  0  0  0
   -2.0387    0.9243    1.8103 P   0  0  0  0  0  0  0  0  0  0  0  0
   -3.0576   -0.1581    1.1920 O   0  0  0  0  0  0  0  0  0  0  0  0
   -2.3927    1.1696    3.3617 O   0  0  0  0  0  0  0  0  0  0  0  0
   -2.1629    2.1989    1.0685 O   0  0  0  0  0  0  0  0  0  0  0  0
    6.0591   -5.4733   -3.3312 O   0  0  0  0  0  0  0  0  0  0  0  0
    7.3320   -5.7253   -2.9876 C   0  0  0  0  0  0  0  0  0  0  0  0
    7.9003   -7.1097   -3.1649 C   0  0  0  0  0  0  0  0  0  0  0  0
    9.3581   -7.1259   -2.7004 C   0  0  0  0  0  0  0  0  0  0  0  0
    9.8974   -8.5564   -2.7630 C   0  0  0  0  0  0  0  0  0  0  0  0
   11.3124   -8.5937   -2.1821 C   0  0  0  0  0  0  0  0  0  0  0  0
   11.8517  -10.0242   -2.2446 C   0  0  0  0  0  0  0  0  0  0  0  0
   13.2666  -10.0616   -1.6638 C   0  0  0  0  0  0  0  0  0  0  0  0
   13.8060  -11.4920   -1.7263 C   0  0  0  0  0  0  0  0  0  0  0  0
   15.2209  -11.5294   -1.1454 C   0  0  0  0  0  0  0  0  0  0  0  0
   15.7603  -12.9598   -1.2080 C   0  0  0  0  0  0  0  0  0  0  0  0
   17.1752  -12.9972   -0.6271 C   0  0  0  0  0  0  0  0  0  0  0  0
   17.7146  -14.4276   -0.6896 C   0  0  0  0  0  0  0  0  0  0  0  0
   19.1295  -14.4650   -0.1088 C   0  0  0  0  0  0  0  0  0  0  0  0
   19.6688  -15.8954   -0.1713 C   0  0  0  0  0  0  0  0  0  0  0  0
    8.0220   -4.8422   -2.5361 O   0  0  0  0  0  0  0  0  0  0  0  0
   10.1387   -6.2849   -3.5521 O   0  0  0  0  0  0  0  0  0  0  0  0
    5.0933   -3.8441   -5.5167 N   0  0  0  0  0  0  0  0  0  0  0  0
    4.3132   -4.0920   -6.5874 C   0  0  0  0  0  0  0  0  0  0  0  0
    4.9193   -4.1406   -7.9663 C   0  0  0  0  0  0  0  0  0  0  0  0
    3.8253   -4.4365   -8.9941 C   0  0  0  0  0  0  0  0  0  0  0  0
    4.4162   -4.3627  -10.4035 C   0  0  0  0  0  0  0  0  0  0  0  0
    3.2991   -4.5350  -11.4346 C   0  0  0  0  0  0  0  0  0  0  0  0
    3.8900   -4.4612  -12.8439 C   0  0  0  0  0  0  0  0  0  0  0  0
    2.7728   -4.6335  -13.8750 C   0  0  0  0  0  0  0  0  0  0  0  0
    3.3637   -4.5598  -15.2844 C   0  0  0  0  0  0  0  0  0  0  0  0
    2.2466   -4.7320  -16.3155 C   0  0  0  0  0  0  0  0  0  0  0  0
    2.8375   -4.6583  -17.7248 C   0  0  0  0  0  0  0  0  0  0  0  0
    1.7203   -4.8305  -18.7559 C   0  0  0  0  0  0  0  0  0  0  0  0
    2.3113   -4.7568  -20.1652 C   0  0  0  0  0  0  0  0  0  0  0  0
    1.1941   -4.9290  -21.1963 C   0  0  0  0  0  0  0  0  0  0  0  0
    1.7850   -4.8553  -22.6057 C   0  0  0  0  0  0  0  0  0  0  0  0
    3.1233   -4.2759   -6.4412 O   0  0  0  0  0  0  0  0  0  0  0  0
    3.2990   -5.7453   -8.7662 O   0  0  0  0  0  0  0  0  0  0  0  0
  4  5  1  0      
  5  6  1  0      
  6  1  1  0      
  4  7  1  0      
  7  8  1  0      
 12 13  1  0      
 13 14  1  0      
 14  9  1  0      
  8 14  1  0      
 12 11  1  0      
 11 10  1  0      
 10  9  1  0      
  4  3  1  0      
  3  2  1  0      
  2  1  1  0      
  6 15  1  0      
 15 16  1  0      
 12 17  1  0      
  9 18  1  0      
  2 19  1  0      
 19 20  1  0      
 20 21  1  0      
 21 22  1  0      
 22 23  1  0      
 23 24  1  0      
 24 25  1  0      
 25 26  1  0      
 26 27  1  0      
 27 28  1  0      
 28 29  1  0      
 29 30  1  0      
 30 31  1  0      
 31 32  1  0      
 32 33  1  0      
 20 34  2  0      
 35 36  1  0      
 36 37  1  0      
 37 38  1  0      
 38 39  1  0      
 39 40  1  0      
 40 41  1  0      
 41 42  1  0      
 42 43  1  0      
 43 44  1  0      
 44 45  1  0      
 45 46  1  0      
 46 47  1  0      
 47 48  1  0      
 48 49  1  0      
 36 50  2  0      
 51 52  1  0      
 52 53  2  0      
 52 54  1  0      
 54 55  1  0      
 55 56  1  0      
 56 57  1  0      
 57 58  1  0      
 58 59  1  0      
 59 60  1  0      
 60 61  1  0      
 61 62  1  0      
 62 63  1  0      
 63 64  1  0      
 64 65  1  0      
 65 66  1  0      
 67 68  1  0      
 68 69  1  0      
 69 70  1  0      
 70 71  1  0      
 71 72  1  0      
 72 73  1  0      
 73 74  1  0      
 74 75  1  0      
 75 76  1  0      
 76 77  1  0      
 77 78  1  0      
 78 79  1  0      
 80 68  2  0      
 55 67  1  0      
 22 35  1  0      
 81 82  1  0      
 82 83  1  0      
 82 84  1  0      
 82 85  2  0      
 10 86  1  0      
 86 87  1  0      
 87 88  1  0      
 88 89  1  0      
 89 90  1  0      
 90 91  1  0      
 91 92  1  0      
 92 93  1  0      
 93 94  1  0      
 94 95  1  0      
 95 96  1  0      
 96 97  1  0      
 97 98  1  0      
 98 99  1  0      
 99100  1  0      
 87101  2  0      
 89102  1  0      
 11103  1  0      
103104  1  0      
104105  1  0      
105106  1  0      
106107  1  0      
107108  1  0      
108109  1  0      
109110  1  0      
110111  1  0      
111112  1  0      
112113  1  0      
113114  1  0      
114115  1  0      
115116  1  0      
116117  1  0      
104118  2  0      
106119  1  0      
  1 81  1  0      
  3 51  1  0      
M  END
$$$$
