# Supplementary material for: Construction of Monophosphoryl Lipid A Producing Escherichia coli Mutants and Comparison of Immuno-Stimulatory Activities of Their Lipopolysaccharides
Source: MDPI journal article supplement (doi:10.3390/md11020363), 2013-01-31
Supplement: s5 [file s5]

marinedrugs-11-00363-s003.mol
  corina  05201404073D 1   1.00000     0.00000 
CORINA 3.49 0023  12.04.2013
104105  0  0  0  0  0  0  0  0999 V2000
   -0.0187    1.5267    0.0104 C   0  0  0  0  0  0  0  0  0  0  0  0
    1.4212    2.0492   -0.0005 C   0  0  0  0  0  0  0  0  0  0  0  0
    2.1715    1.4713    1.2034 C   0  0  0  0  0  0  0  0  0  0  0  0
    2.1077   -0.0573    1.1489 C   0  0  0  0  0  0  0  0  0  0  0  0
    0.7413   -0.4753    1.1306 O   0  0  0  0  0  0  0  0  0  0  0  0
    0.0021   -0.0041    0.0020 C   0  0  0  0  0  0  0  0  0  0  0  0
    2.7635   -0.5198   -0.0335 O   0  0  0  0  0  0  0  0  0  0  0  0
    2.8587   -1.9426   -0.1266 C   0  0  0  0  0  0  0  0  0  0  0  0
    3.7865   -3.8376   -1.4664 C   0  0  0  0  0  0  0  0  0  0  0  0
    4.4490   -4.2161   -2.7946 C   0  0  0  0  0  0  0  0  0  0  0  0
    3.5733   -3.7194   -3.9491 C   0  0  0  0  0  0  0  0  0  0  0  0
    3.3696   -2.2084   -3.8113 C   0  0  0  0  0  0  0  0  0  0  0  0
    2.7785   -1.9226   -2.5420 O   0  0  0  0  0  0  0  0  0  0  0  0
    3.5745   -2.3220   -1.4245 C   0  0  0  0  0  0  0  0  0  0  0  0
   -1.4314   -0.5342    0.0735 C   0  0  0  0  0  0  0  0  0  0  0  0
   -1.4195   -1.9578   -0.0502 O   0  0  0  0  0  0  0  0  0  0  0  0
    2.5075   -1.7468   -4.8533 O   0  0  0  0  0  0  0  0  0  0  0  0
    2.5248   -4.4994   -1.3564 O   0  0  0  0  0  0  0  0  0  0  0  0
    1.4126    3.4987    0.0826 O   0  0  0  0  0  0  0  0  0  0  0  0
    1.3844    4.1754   -1.0763 C   0  0  0  0  0  0  0  0  0  0  0  0
    1.3738    5.6824   -1.0689 C   0  0  0  0  0  0  0  0  0  0  0  0
    1.3411    6.1993   -2.5085 C   0  0  0  0  0  0  0  0  0  0  0  0
    1.2047    7.7231   -2.5003 C   0  0  0  0  0  0  0  0  0  0  0  0
    1.0467    8.2288   -3.9357 C   0  0  0  0  0  0  0  0  0  0  0  0
    0.9103    9.7527   -3.9274 C   0  0  0  0  0  0  0  0  0  0  0  0
    0.7523   10.2583   -5.3628 C   0  0  0  0  0  0  0  0  0  0  0  0
    0.6159   11.7822   -5.3546 C   0  0  0  0  0  0  0  0  0  0  0  0
    0.4579   12.2879   -6.7899 C   0  0  0  0  0  0  0  0  0  0  0  0
    0.3215   13.8117   -6.7817 C   0  0  0  0  0  0  0  0  0  0  0  0
    0.1635   14.3174   -8.2171 C   0  0  0  0  0  0  0  0  0  0  0  0
    0.0271   15.8413   -8.2089 C   0  0  0  0  0  0  0  0  0  0  0  0
   -0.1309   16.3469   -9.6442 C   0  0  0  0  0  0  0  0  0  0  0  0
   -0.2673   17.8708   -9.6360 C   0  0  0  0  0  0  0  0  0  0  0  0
    1.3675    3.5763   -2.1254 O   0  0  0  0  0  0  0  0  0  0  0  0
    2.5516    5.8330   -3.1738 O   0  0  0  0  0  0  0  0  0  0  0  0
    3.5704    1.9047    1.1625 N   0  0  0  0  0  0  0  0  0  0  0  0
    4.2911    1.9635    2.2998 C   0  0  0  0  0  0  0  0  0  0  0  0
    3.7817    1.6577    3.3571 O   0  0  0  0  0  0  0  0  0  0  0  0
    5.7301    2.4093    2.2577 C   0  0  0  0  0  0  0  0  0  0  0  0
    6.3126    2.3866    3.6723 C   0  0  0  0  0  0  0  0  0  0  0  0
    7.8051    2.7182    3.6146 C   0  0  0  0  0  0  0  0  0  0  0  0
    8.4140    2.5738    5.0108 C   0  0  0  0  0  0  0  0  0  0  0  0
    9.9065    2.9055    4.9531 C   0  0  0  0  0  0  0  0  0  0  0  0
   10.5154    2.7611    6.3493 C   0  0  0  0  0  0  0  0  0  0  0  0
   12.0079    3.0928    6.2916 C   0  0  0  0  0  0  0  0  0  0  0  0
   12.6168    2.9484    7.6878 C   0  0  0  0  0  0  0  0  0  0  0  0
   14.1093    3.2800    7.6301 C   0  0  0  0  0  0  0  0  0  0  0  0
   14.7181    3.1356    9.0262 C   0  0  0  0  0  0  0  0  0  0  0  0
   16.2106    3.4673    8.9685 C   0  0  0  0  0  0  0  0  0  0  0  0
   16.8195    3.3229   10.3647 C   0  0  0  0  0  0  0  0  0  0  0  0
   18.3120    3.6546   10.3070 C   0  0  0  0  0  0  0  0  0  0  0  0
    5.6295    3.3705    4.4929 O   0  0  0  0  0  0  0  0  0  0  0  0
    5.5307    3.1066    5.8053 C   0  0  0  0  0  0  0  0  0  0  0  0
    4.8350    4.0818    6.7197 C   0  0  0  0  0  0  0  0  0  0  0  0
    4.8614    3.5455    8.1523 C   0  0  0  0  0  0  0  0  0  0  0  0
    4.1551    4.5356    9.0807 C   0  0  0  0  0  0  0  0  0  0  0  0
    4.1815    3.9992   10.5133 C   0  0  0  0  0  0  0  0  0  0  0  0
    3.4752    4.9893   11.4417 C   0  0  0  0  0  0  0  0  0  0  0  0
    3.5016    4.4529   12.8743 C   0  0  0  0  0  0  0  0  0  0  0  0
    2.7953    5.4430   13.8027 C   0  0  0  0  0  0  0  0  0  0  0  0
    2.8217    4.9066   15.2353 C   0  0  0  0  0  0  0  0  0  0  0  0
    2.1154    5.8967   16.1637 C   0  0  0  0  0  0  0  0  0  0  0  0
    2.1418    5.3603   17.5963 C   0  0  0  0  0  0  0  0  0  0  0  0
    1.4355    6.3504   18.5247 C   0  0  0  0  0  0  0  0  0  0  0  0
    5.9994    2.0872    6.2535 O   0  0  0  0  0  0  0  0  0  0  0  0
   -0.6854    1.9888    1.1869 O   0  0  0  0  0  0  0  0  0  0  0  0
   -2.0117    2.9005    1.1422 P   0  0  0  0  0  0  0  0  0  0  0  0
   -2.5610    3.1223    2.6393 O   0  0  0  0  0  0  0  0  0  0  0  0
   -1.6606    4.3266    0.4826 O   0  0  0  0  0  0  0  0  0  0  0  0
   -3.0485    2.2237    0.3315 O   0  0  0  0  0  0  0  0  0  0  0  0
    4.5861   -5.6594   -2.8751 O   0  0  0  0  0  0  0  0  0  0  0  0
    5.7241   -6.1907   -2.4012 C   0  0  0  0  0  0  0  0  0  0  0  0
    5.9374   -7.6817   -2.4512 C   0  0  0  0  0  0  0  0  0  0  0  0
    7.3038   -8.0217   -1.8525 C   0  0  0  0  0  0  0  0  0  0  0  0
    7.4687   -9.5414   -1.7886 C   0  0  0  0  0  0  0  0  0  0  0  0
    8.7795   -9.8827   -1.0770 C   0  0  0  0  0  0  0  0  0  0  0  0
    8.9444  -11.4024   -1.0131 C   0  0  0  0  0  0  0  0  0  0  0  0
   10.2552  -11.7437   -0.3016 C   0  0  0  0  0  0  0  0  0  0  0  0
   10.4201  -13.2634   -0.2377 C   0  0  0  0  0  0  0  0  0  0  0  0
   11.7309  -13.6047    0.4739 C   0  0  0  0  0  0  0  0  0  0  0  0
   11.8959  -15.1244    0.5378 C   0  0  0  0  0  0  0  0  0  0  0  0
   13.2066  -15.4657    1.2494 C   0  0  0  0  0  0  0  0  0  0  0  0
   13.3716  -16.9854    1.3133 C   0  0  0  0  0  0  0  0  0  0  0  0
   14.6823  -17.3267    2.0248 C   0  0  0  0  0  0  0  0  0  0  0  0
   14.8473  -18.8464    2.0887 C   0  0  0  0  0  0  0  0  0  0  0  0
    6.5773   -5.4736   -1.9347 O   0  0  0  0  0  0  0  0  0  0  0  0
    8.3343   -7.4647   -2.6709 O   0  0  0  0  0  0  0  0  0  0  0  0
    4.2333   -4.0101   -5.2243 N   0  0  0  0  0  0  0  0  0  0  0  0
    3.5009   -4.1374   -6.3485 C   0  0  0  0  0  0  0  0  0  0  0  0
    4.1798   -4.4364   -7.6603 C   0  0  0  0  0  0  0  0  0  0  0  0
    3.1292   -4.5296   -8.7687 C   0  0  0  0  0  0  0  0  0  0  0  0
    3.8266   -4.7090  -10.1186 C   0  0  0  0  0  0  0  0  0  0  0  0
    2.7850   -4.6772  -11.2389 C   0  0  0  0  0  0  0  0  0  0  0  0
    3.4824   -4.8566  -12.5889 C   0  0  0  0  0  0  0  0  0  0  0  0
    2.4409   -4.8248  -13.7092 C   0  0  0  0  0  0  0  0  0  0  0  0
    3.1383   -5.0042  -15.0591 C   0  0  0  0  0  0  0  0  0  0  0  0
    2.0967   -4.9724  -16.1794 C   0  0  0  0  0  0  0  0  0  0  0  0
    2.7941   -5.1518  -17.5294 C   0  0  0  0  0  0  0  0  0  0  0  0
    1.7526   -5.1200  -18.6497 C   0  0  0  0  0  0  0  0  0  0  0  0
    2.4500   -5.2994  -19.9996 C   0  0  0  0  0  0  0  0  0  0  0  0
    1.4084   -5.2676  -21.1200 C   0  0  0  0  0  0  0  0  0  0  0  0
    2.1058   -5.4470  -22.4699 C   0  0  0  0  0  0  0  0  0  0  0  0
    2.2955   -4.0112   -6.3045 O   0  0  0  0  0  0  0  0  0  0  0  0
    2.2743   -5.6478   -8.5219 O   0  0  0  0  0  0  0  0  0  0  0  0
  4  5  1  0      
  5  6  1  0      
  6  1  1  0      
  4  7  1  0      
  7  8  1  0      
 12 13  1  0      
 13 14  1  0      
 14  9  1  0      
  8 14  1  0      
 12 11  1  0      
 11 10  1  0      
 10  9  1  0      
  4  3  1  0      
  3  2  1  0      
  2  1  1  0      
  6 15  1  0      
 15 16  1  0      
 12 17  1  0      
  9 18  1  0      
  2 19  1  0      
 19 20  1  0      
 20 21  1  0      
 21 22  1  0      
 22 23  1  0      
 23 24  1  0      
 24 25  1  0      
 25 26  1  0      
 26 27  1  0      
 27 28  1  0      
 28 29  1  0      
 29 30  1  0      
 30 31  1  0      
 31 32  1  0      
 32 33  1  0      
 20 34  2  0      
 36 37  1  0      
 37 38  2  0      
 37 39  1  0      
 39 40  1  0      
 40 41  1  0      
 41 42  1  0      
 42 43  1  0      
 43 44  1  0      
 44 45  1  0      
 45 46  1  0      
 46 47  1  0      
 47 48  1  0      
 48 49  1  0      
 49 50  1  0      
 50 51  1  0      
 52 53  1  0      
 53 54  1  0      
 54 55  1  0      
 55 56  1  0      
 56 57  1  0      
 57 58  1  0      
 58 59  1  0      
 59 60  1  0      
 60 61  1  0      
 61 62  1  0      
 62 63  1  0      
 63 64  1  0      
 65 53  2  0      
 40 52  1  0      
 22 35  1  0      
 66 67  1  0      
 67 68  1  0      
 67 69  1  0      
 67 70  2  0      
 10 71  1  0      
 71 72  1  0      
 72 73  1  0      
 73 74  1  0      
 74 75  1  0      
 75 76  1  0      
 76 77  1  0      
 77 78  1  0      
 78 79  1  0      
 79 80  1  0      
 80 81  1  0      
 81 82  1  0      
 82 83  1  0      
 83 84  1  0      
 84 85  1  0      
 72 86  2  0      
 74 87  1  0      
 11 88  1  0      
 88 89  1  0      
 89 90  1  0      
 90 91  1  0      
 91 92  1  0      
 92 93  1  0      
 93 94  1  0      
 94 95  1  0      
 95 96  1  0      
 96 97  1  0      
 97 98  1  0      
 98 99  1  0      
 99100  1  0      
100101  1  0      
101102  1  0      
 89103  2  0      
 91104  1  0      
  1 66  1  0      
  3 36  1  0      
M  END
$$$$
