# Supplementary material for: Construction of Monophosphoryl Lipid A Producing Escherichia coli Mutants and Comparison of Immuno-Stimulatory Activities of Their Lipopolysaccharides
Source: MDPI journal article supplement (doi:10.3390/md11020363), 2013-01-31
Supplement: s6 [file s6]

marinedrugs-11-00363-s003.mol
  ChemDraw04241410112D

104105  0  0  0  0  0  0  0  0999 V2000
   -1.3734    5.7459    0.0000 C   0  0  0  0  0  0  0  0  0  0  0  0
   -0.9609    5.0314    0.0000 C   0  0  0  0  0  0  0  0  0  0  0  0
   -0.1628    5.2405    0.0000 C   0  0  0  0  0  0  0  0  0  0  0  0
    0.6304    5.0314    0.0000 C   0  0  0  0  0  0  0  0  0  0  0  0
    0.2180    5.7459    0.0000 O   0  0  0  0  0  0  0  0  0  0  0  0
   -0.5802    5.5369    0.0000 C   0  0  0  0  0  0  0  0  0  0  0  0
    1.3449    5.4439    0.0000 O   0  0  0  0  0  0  0  0  0  0  0  0
    2.2571    5.2702    0.0000 C   0  0  0  0  0  0  0  0  0  0  0  0
    1.9266    4.7352    0.0000 C   0  0  0  0  0  0  0  0  0  0  0  0
    2.3391    4.0208    0.0000 C   0  0  0  0  0  0  0  0  0  0  0  0
    3.1372    4.2299    0.0000 C   0  0  0  0  0  0  0  0  0  0  0  0
    3.9304    4.0208    0.0000 C   0  0  0  0  0  0  0  0  0  0  0  0
    3.5180    4.7352    0.0000 O   0  0  0  0  0  0  0  0  0  0  0  0
    2.7198    4.5262    0.0000 C   0  0  0  0  0  0  0  0  0  0  0  0
   -1.1636    6.1202    0.0000 C   0  0  0  0  0  0  0  0  0  0  0  0
   -0.3667    6.3338    0.0000 O   0  0  0  0  0  0  0  0  0  0  0  0
    3.9304    3.1958    0.0000 O   0  0  0  0  0  0  0  0  0  0  0  0
    1.2121    4.3227    0.0000 O   0  0  0  0  0  0  0  0  0  0  0  0
   -1.7578    5.2449    0.0000 O   0  0  0  0  0  0  0  0  0  0  0  0
   -2.1703    4.5305    0.0000 C   0  0  0  0  0  0  0  0  0  0  0  0
   -1.7578    3.8160    0.0000 C   0  0  0  0  0  0  0  0  0  0  0  0
   -2.1703    3.1015    0.0000 C   0  0  0  0  0  0  0  0  0  0  0  0
   -1.7578    2.3870    0.0000 C   0  0  0  0  0  0  0  0  0  0  0  0
   -2.1703    1.6726    0.0000 C   0  0  0  0  0  0  0  0  0  0  0  0
   -1.7578    0.9581    0.0000 C   0  0  0  0  0  0  0  0  0  0  0  0
   -2.1703    0.2436    0.0000 C   0  0  0  0  0  0  0  0  0  0  0  0
   -1.7578   -0.4708    0.0000 C   0  0  0  0  0  0  0  0  0  0  0  0
   -2.1703   -1.1853    0.0000 C   0  0  0  0  0  0  0  0  0  0  0  0
   -1.7578   -1.8998    0.0000 C   0  0  0  0  0  0  0  0  0  0  0  0
   -2.1703   -2.6143    0.0000 C   0  0  0  0  0  0  0  0  0  0  0  0
   -1.7578   -3.3287    0.0000 C   0  0  0  0  0  0  0  0  0  0  0  0
   -2.1703   -4.0432    0.0000 C   0  0  0  0  0  0  0  0  0  0  0  0
   -1.7578   -4.7577    0.0000 C   0  0  0  0  0  0  0  0  0  0  0  0
   -2.9953    4.5305    0.0000 O   0  0  0  0  0  0  0  0  0  0  0  0
   -2.9953    3.1015    0.0000 O   0  0  0  0  0  0  0  0  0  0  0  0
    0.2830    4.5631    0.0000 N   0  0  0  0  0  0  0  0  0  0  0  0
   -0.1295    3.8487    0.0000 C   0  0  0  0  0  0  0  0  0  0  0  0
   -0.9545    3.8487    0.0000 O   0  0  0  0  0  0  0  0  0  0  0  0
    0.2830    3.1342    0.0000 C   0  0  0  0  0  0  0  0  0  0  0  0
   -0.1295    2.4197    0.0000 C   0  0  0  0  0  0  0  0  0  0  0  0
    0.2830    1.7052    0.0000 C   0  0  0  0  0  0  0  0  0  0  0  0
   -0.1295    0.9908    0.0000 C   0  0  0  0  0  0  0  0  0  0  0  0
    0.2830    0.2763    0.0000 C   0  0  0  0  0  0  0  0  0  0  0  0
   -0.1295   -0.4382    0.0000 C   0  0  0  0  0  0  0  0  0  0  0  0
    0.2830   -1.1526    0.0000 C   0  0  0  0  0  0  0  0  0  0  0  0
   -0.1295   -1.8671    0.0000 C   0  0  0  0  0  0  0  0  0  0  0  0
    0.2830   -2.5816    0.0000 C   0  0  0  0  0  0  0  0  0  0  0  0
   -0.1295   -3.2961    0.0000 C   0  0  0  0  0  0  0  0  0  0  0  0
    0.2830   -4.0105    0.0000 C   0  0  0  0  0  0  0  0  0  0  0  0
   -0.1295   -4.7250    0.0000 C   0  0  0  0  0  0  0  0  0  0  0  0
    0.2830   -5.4395    0.0000 C   0  0  0  0  0  0  0  0  0  0  0  0
   -0.9545    2.4197    0.0000 O   0  0  0  0  0  0  0  0  0  0  0  0
   -1.3670    1.7052    0.0000 C   0  0  0  0  0  0  0  0  0  0  0  0
   -0.9545    0.9908    0.0000 C   0  0  0  0  0  0  0  0  0  0  0  0
   -1.3670    0.2763    0.0000 C   0  0  0  0  0  0  0  0  0  0  0  0
   -0.9545   -0.4382    0.0000 C   0  0  0  0  0  0  0  0  0  0  0  0
   -1.3670   -1.1526    0.0000 C   0  0  0  0  0  0  0  0  0  0  0  0
   -0.9545   -1.8671    0.0000 C   0  0  0  0  0  0  0  0  0  0  0  0
   -1.3670   -2.5816    0.0000 C   0  0  0  0  0  0  0  0  0  0  0  0
   -0.9545   -3.2961    0.0000 C   0  0  0  0  0  0  0  0  0  0  0  0
   -1.3670   -4.0105    0.0000 C   0  0  0  0  0  0  0  0  0  0  0  0
   -0.9545   -4.7250    0.0000 C   0  0  0  0  0  0  0  0  0  0  0  0
   -1.3670   -5.4395    0.0000 C   0  0  0  0  0  0  0  0  0  0  0  0
   -0.9545   -6.1539    0.0000 C   0  0  0  0  0  0  0  0  0  0  0  0
   -1.8266    1.7021    0.0000 O   0  0  0  0  0  0  0  0  0  0  0  0
   -2.3423    5.7446    0.0000 O   0  0  0  0  0  0  0  0  0  0  0  0
   -3.1054    5.7446    0.0000 P   0  0  0  0  0  0  0  0  0  0  0  0
   -3.1054    4.9196    0.0000 O   0  0  0  0  0  0  0  0  0  0  0  0
   -3.9304    5.7446    0.0000 O   0  0  0  0  0  0  0  0  0  0  0  0
   -3.1054    6.5696    0.0000 O   0  0  0  0  0  0  0  0  0  0  0  0
    1.5422    4.2343    0.0000 O   0  0  0  0  0  0  0  0  0  0  0  0
    1.1297    3.5198    0.0000 C   0  0  0  0  0  0  0  0  0  0  0  0
    1.5422    2.8054    0.0000 C   0  0  0  0  0  0  0  0  0  0  0  0
    1.1297    2.0909    0.0000 C   0  0  0  0  0  0  0  0  0  0  0  0
    1.5422    1.3764    0.0000 C   0  0  0  0  0  0  0  0  0  0  0  0
    1.1297    0.6619    0.0000 C   0  0  0  0  0  0  0  0  0  0  0  0
    1.5422   -0.0525    0.0000 C   0  0  0  0  0  0  0  0  0  0  0  0
    1.1297   -0.7670    0.0000 C   0  0  0  0  0  0  0  0  0  0  0  0
    1.5422   -1.4815    0.0000 C   0  0  0  0  0  0  0  0  0  0  0  0
    1.1297   -2.1959    0.0000 C   0  0  0  0  0  0  0  0  0  0  0  0
    1.5422   -2.9104    0.0000 C   0  0  0  0  0  0  0  0  0  0  0  0
    1.1297   -3.6249    0.0000 C   0  0  0  0  0  0  0  0  0  0  0  0
    1.5422   -4.3393    0.0000 C   0  0  0  0  0  0  0  0  0  0  0  0
    1.1297   -5.0538    0.0000 C   0  0  0  0  0  0  0  0  0  0  0  0
    1.5422   -5.7683    0.0000 C   0  0  0  0  0  0  0  0  0  0  0  0
    0.3047    3.5198    0.0000 O   0  0  0  0  0  0  0  0  0  0  0  0
    0.3047    2.0909    0.0000 O   0  0  0  0  0  0  0  0  0  0  0  0
    3.3507    3.4330    0.0000 N   0  0  0  0  0  0  0  0  0  0  0  0
    2.9382    2.7185    0.0000 C   0  0  0  0  0  0  0  0  0  0  0  0
    3.3507    2.0040    0.0000 C   0  0  0  0  0  0  0  0  0  0  0  0
    2.9382    1.2896    0.0000 C   0  0  0  0  0  0  0  0  0  0  0  0
    3.3507    0.5751    0.0000 C   0  0  0  0  0  0  0  0  0  0  0  0
    2.9382   -0.1394    0.0000 C   0  0  0  0  0  0  0  0  0  0  0  0
    3.3507   -0.8538    0.0000 C   0  0  0  0  0  0  0  0  0  0  0  0
    2.9382   -1.5683    0.0000 C   0  0  0  0  0  0  0  0  0  0  0  0
    3.3507   -2.2828    0.0000 C   0  0  0  0  0  0  0  0  0  0  0  0
    2.9382   -2.9973    0.0000 C   0  0  0  0  0  0  0  0  0  0  0  0
    3.3507   -3.7117    0.0000 C   0  0  0  0  0  0  0  0  0  0  0  0
    2.9382   -4.4262    0.0000 C   0  0  0  0  0  0  0  0  0  0  0  0
    3.3507   -5.1407    0.0000 C   0  0  0  0  0  0  0  0  0  0  0  0
    2.9382   -5.8551    0.0000 C   0  0  0  0  0  0  0  0  0  0  0  0
    3.3507   -6.5696    0.0000 C   0  0  0  0  0  0  0  0  0  0  0  0
    2.1132    2.7185    0.0000 O   0  0  0  0  0  0  0  0  0  0  0  0
    2.1132    1.2896    0.0000 O   0  0  0  0  0  0  0  0  0  0  0  0
  4  5  1  0      
  5  6  1  0      
  6  1  1  0      
  4  7  1  0      
  7  8  1  0      
 12 13  1  0      
 13 14  1  0      
 14  9  1  0      
  8 14  1  0      
 12 11  1  1      
 11 10  1  1      
 10  9  1  1      
  4  3  1  1      
  3  2  1  1      
  2  1  1  1      
  6 15  1  0      
 15 16  1  0      
 12 17  1  0      
  9 18  1  0      
  2 19  1  0      
 19 20  1  0      
 20 21  1  0      
 21 22  1  0      
 22 23  1  0      
 23 24  1  0      
 24 25  1  0      
 25 26  1  0      
 26 27  1  0      
 27 28  1  0      
 28 29  1  0      
 29 30  1  0      
 30 31  1  0      
 31 32  1  0      
 32 33  1  0      
 20 34  2  0      
 36 37  1  0      
 37 38  2  0      
 37 39  1  0      
 39 40  1  0      
 40 41  1  0      
 41 42  1  0      
 42 43  1  0      
 43 44  1  0      
 44 45  1  0      
 45 46  1  0      
 46 47  1  0      
 47 48  1  0      
 48 49  1  0      
 49 50  1  0      
 50 51  1  0      
 52 53  1  0      
 53 54  1  0      
 54 55  1  0      
 55 56  1  0      
 56 57  1  0      
 57 58  1  0      
 58 59  1  0      
 59 60  1  0      
 60 61  1  0      
 61 62  1  0      
 62 63  1  0      
 63 64  1  0      
 65 53  2  0      
 40 52  1  1      
 22 35  1  1      
 66 67  1  0      
 67 68  1  0      
 67 69  1  0      
 67 70  2  0      
 10 71  1  0      
 71 72  1  0      
 72 73  1  0      
 73 74  1  0      
 74 75  1  0      
 75 76  1  0      
 76 77  1  0      
 77 78  1  0      
 78 79  1  0      
 79 80  1  0      
 80 81  1  0      
 81 82  1  0      
 82 83  1  0      
 83 84  1  0      
 84 85  1  0      
 72 86  2  0      
 74 87  1  1      
 11 88  1  0      
 88 89  1  0      
 89 90  1  0      
 90 91  1  0      
 91 92  1  0      
 92 93  1  0      
 93 94  1  0      
 94 95  1  0      
 95 96  1  0      
 96 97  1  0      
 97 98  1  0      
 98 99  1  0      
 99100  1  0      
100101  1  0      
101102  1  0      
 89103  2  0      
 91104  1  1      
  1 66  1  0      
  3 36  1  0      
M  END
